# Supplementary material
Source: publisher figshare collection journal article supplement (https://plos.figshare.com/articles/dataset/_/4446410)

A

|     |     |                                                               |     |
|-----|-----|---------------------------------------------------------------|-----|
| tel | 1   | GGCCAGGCGCGGTGGCTCACACCTGTAATCCCAGCACTTTGGGAGGCCGAGGCGGTCTGGA | 60  |
| cen | 1   | GGCCAGGTGCAGTGGCTCATGCCTCTAATCCCAACACTTTGGGAGGCCAAGGCAGGTGGA  | 60  |
| tel | 61  | TCACG--AGGTCAGGAGATCGAAACCATCCTGGCTAACACGGTGAAACCCTGTCTCTACT  | 118 |
| cen | 61  | TCACCTAAGGTCAGGAGTTTGAGACCAGCCTGGCCAACATGGCAGAACCCTGTCTCTACT  | 120 |
| tel | 119 | AAAAATACAAAAAATTAGCCGGGCGTGGTGGCGGGCGCCC--GTAGTCCCAGCTACTAGG  | 176 |
| cen | 121 | AAAAATACAAAAAATTAGCTGGGTGGGATGGCACGCGCACCTGTAGTCCCAGCTACTAGG  | 180 |
| tel | 177 | GAGGCTGAGGCAGGAGAATGGCATGAATCCGGGAGGCGGAGCTTGCACTGAGCCAAGATT  | 236 |
| cen | 181 | GAGGCTGAGGCAGGAGAATGACTTGAAGTCAGGAAGTGAAGGTTTCAGTGAGCCAAGATT  | 240 |
| tel | 237 | GCTCCACTGCACTCCAGCCTGGGTGGC-AGAGACAGACCTTGTCTCAAAATAATAACAAT  | 295 |
| cen | 241 | GCACCACTGTACTCTAGCCTGGGCAACAAGAGCAAACTCCATCTCAAAAAAAAAAAAAAA  | 300 |
| tel | 296 | AATAATAA 303                                                  |     |
| cen | 301 | AAAAAAA 308                                                   |     |

green - retained  
black - deleted

B

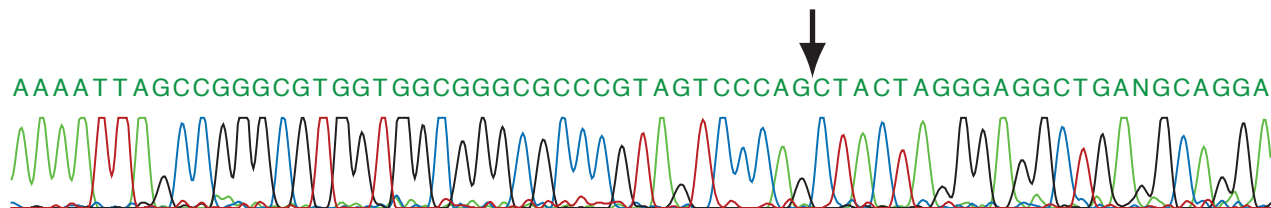

Supplement: Supplementary file 1 [file 1 › S2 Fig.pdf]
