# Supplementary material
Source: publisher figshare collection journal article supplement (https://plos.figshare.com/articles/dataset/_/4446410)
Supplement: Supplementary file 1 [file 1 › S4 Fig.pdf]

#### 1AB guide pair

```
ref + CCTTCTGATAATCCCATCCATGAAAGTATGTGGGAACTGGAGGTAGAAGATTTACACAGGAATATTCCCTTAGAGTATGTTGGAAC
      GGGTAGGTACTTTCATACACCCT          TGGAGGTAGAAGATTTACACAGG
ref - GGAAAGACTATTAGGGTAGGTACTTTCATACACCCTTGACCTCCATCTTCTAAATGTGTCCTTATAAGGAATCTCATACAACCTTG

1-2   CCTTCTGATAATCCCATCCATGAAAGTATGTGGGAACTGG-- 14-bp del -CACAGGAATATTCCCTTAGAGTATGTTGGAAC
1-2   CCTTT-- 14-bp del -CATGAAAGTATGTGGGAACTGGAGGTAGAAGATTTACACAGGAATATTCCCTTAGAGTATGTTGGAAC

1-3   CCTTCTGATAATCCCATCCATGAAAGTATGT----- 48-bp del -----TGGAAC
```

#### 4AB guide pair

```
ref + CTGCAGCCCTGAGCCCTGCCTGCAGGCTGTGAAGATGACAGACCTTCTGATAATCCCATCCATGAAAGTATGTGGGAA
      GGGACGGACGTCCGACACTTCTA          TCCCATCCATGAAAGTATGTGGG
ref - GACGTCGGGACTCGGGACGGACGTCCGACACTTCTACTGTCTGGAAGACTATTAGGGTAGGTACTTTCATACACCCTT

4-6   CTGCAGCCCTGAGCCCTG----- 55-bp del -----TGGGAA
4-6   CTGCAGCCCTGAGCCCTG----- 95-bp ins + 50-bp del -----GTATGTGGGAA
```

#### 1-2

14 bp deletion in coding sequence (cds)

c.413\_426del

14 bp deletion in cds

c.378\_391del

#### 1-3

only one PCR product detectable on gel

48 bp deletion spanning stop

c.402\_\*5del

#### 4-6

55 bp deletion in cds

c.347\_401del

50 bp deletion in cds and a 95 bp insertion

c.348\_397delins chr8:33126352-33126446
