# Supplementary material
Source: publisher figshare collection journal article supplement (https://plos.figshare.com/articles/dataset/_/4446410)

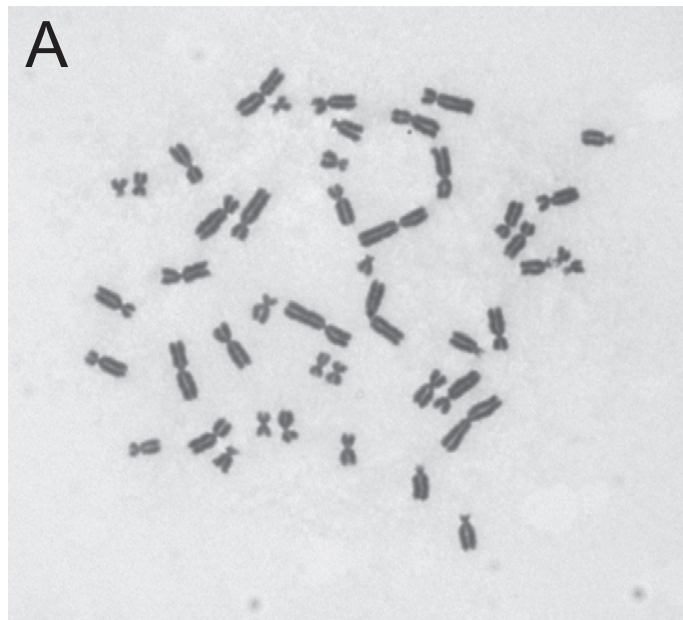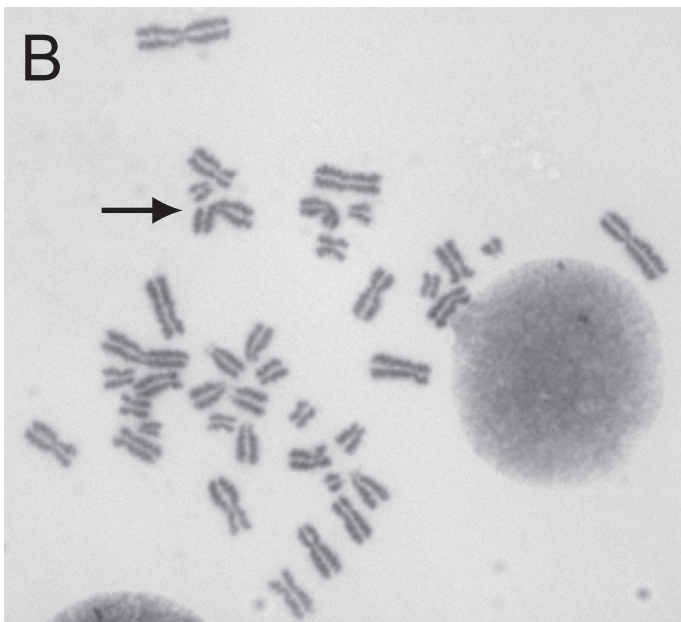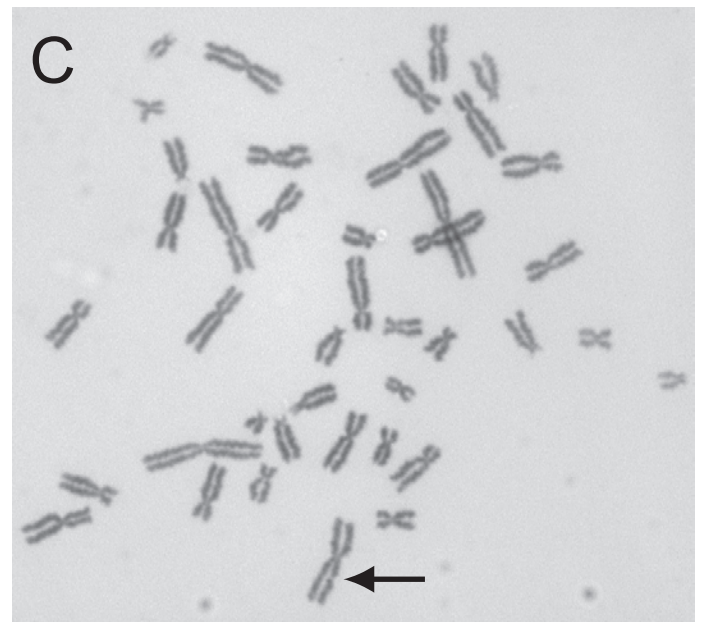

Supplementary Figure 3

Supplement: Supplementary file 1 [file 1 › S3 Fig.pdf]

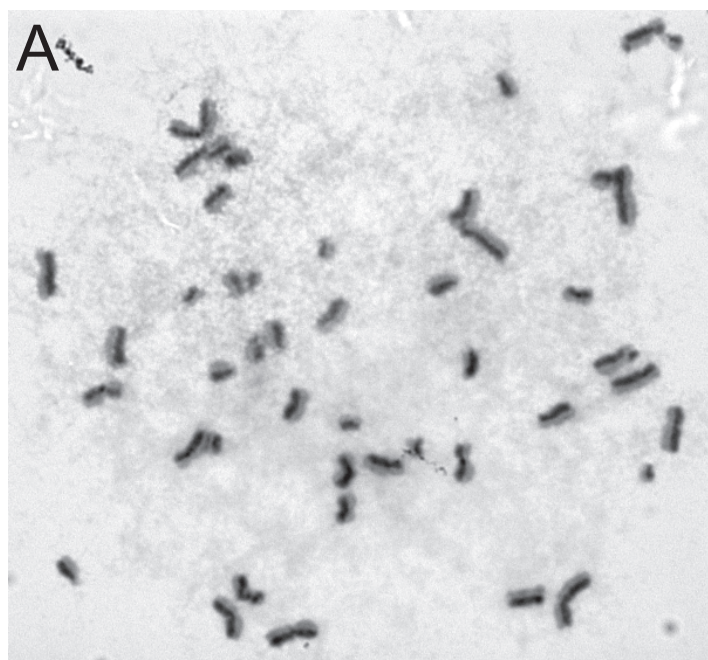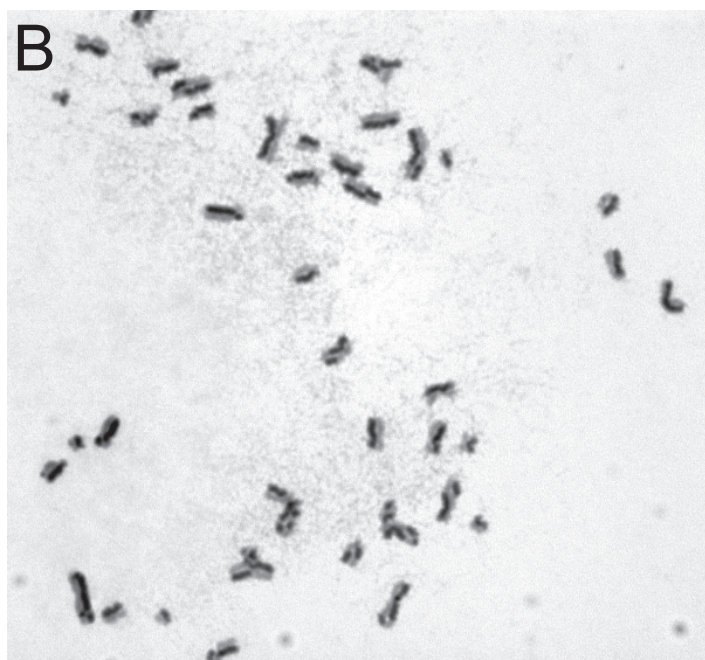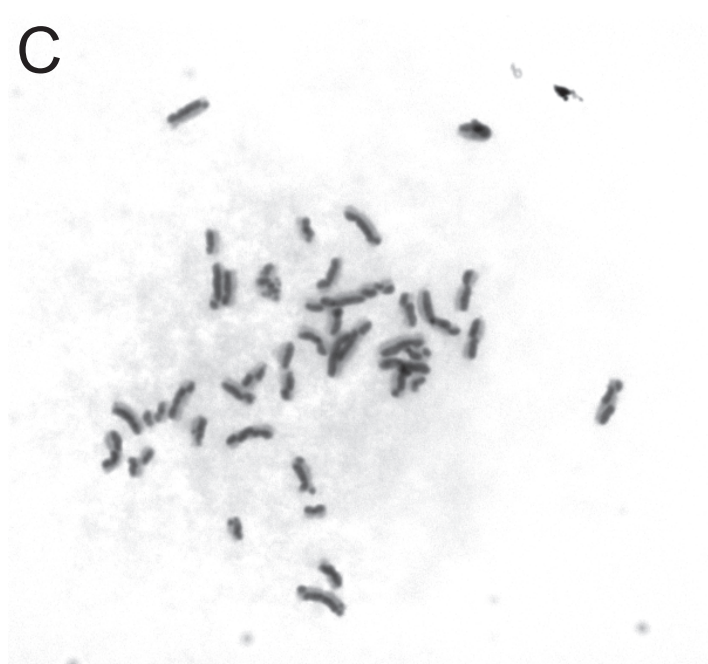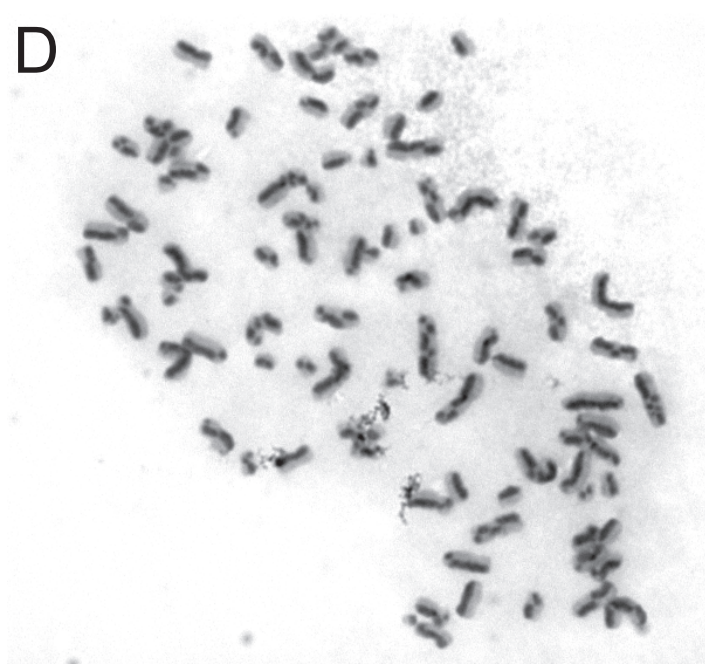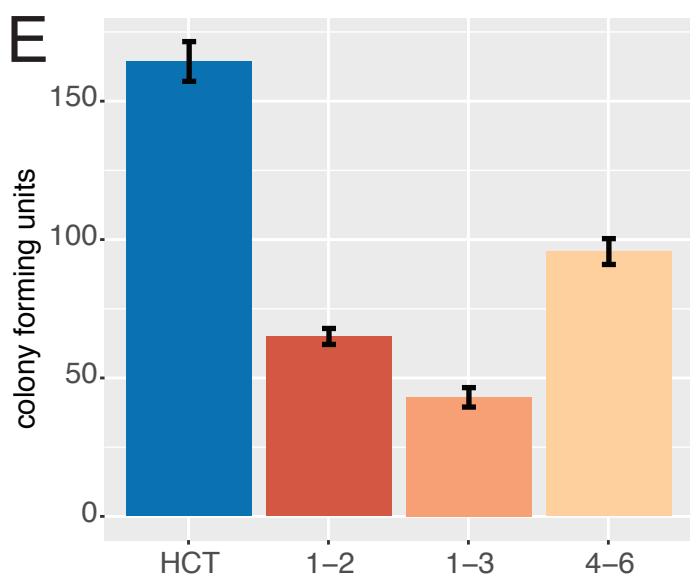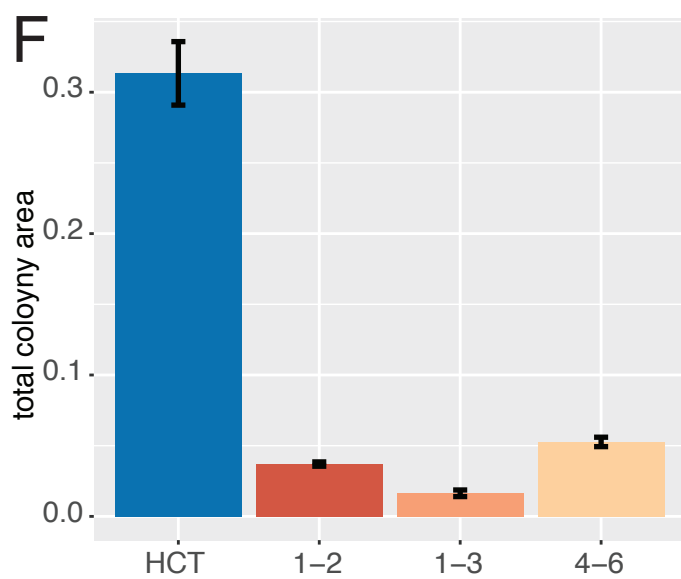

Supplementary Figure 5

Supplement: Supplementary file 1 [file 1 › S5 Fig.pdf]

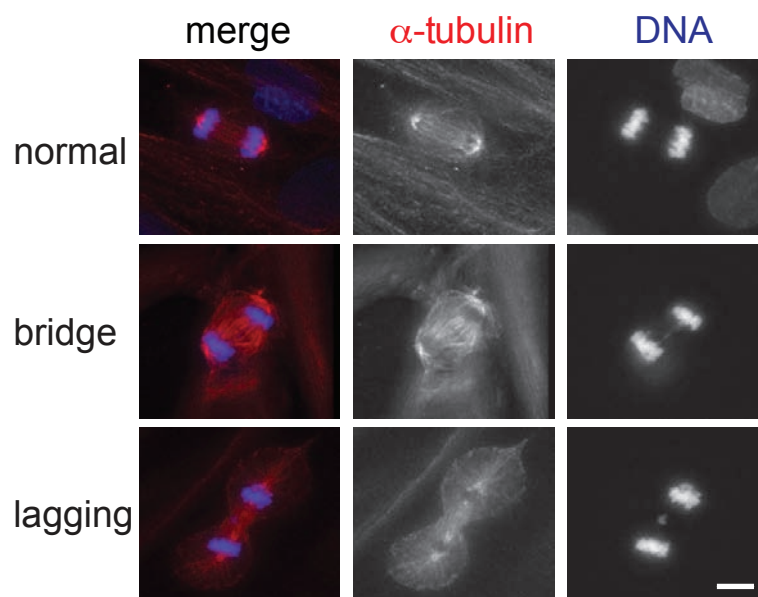

Supplementary Figure 6

Supplement: Supplementary file 1 [file 1 › S6 Fig.pdf]

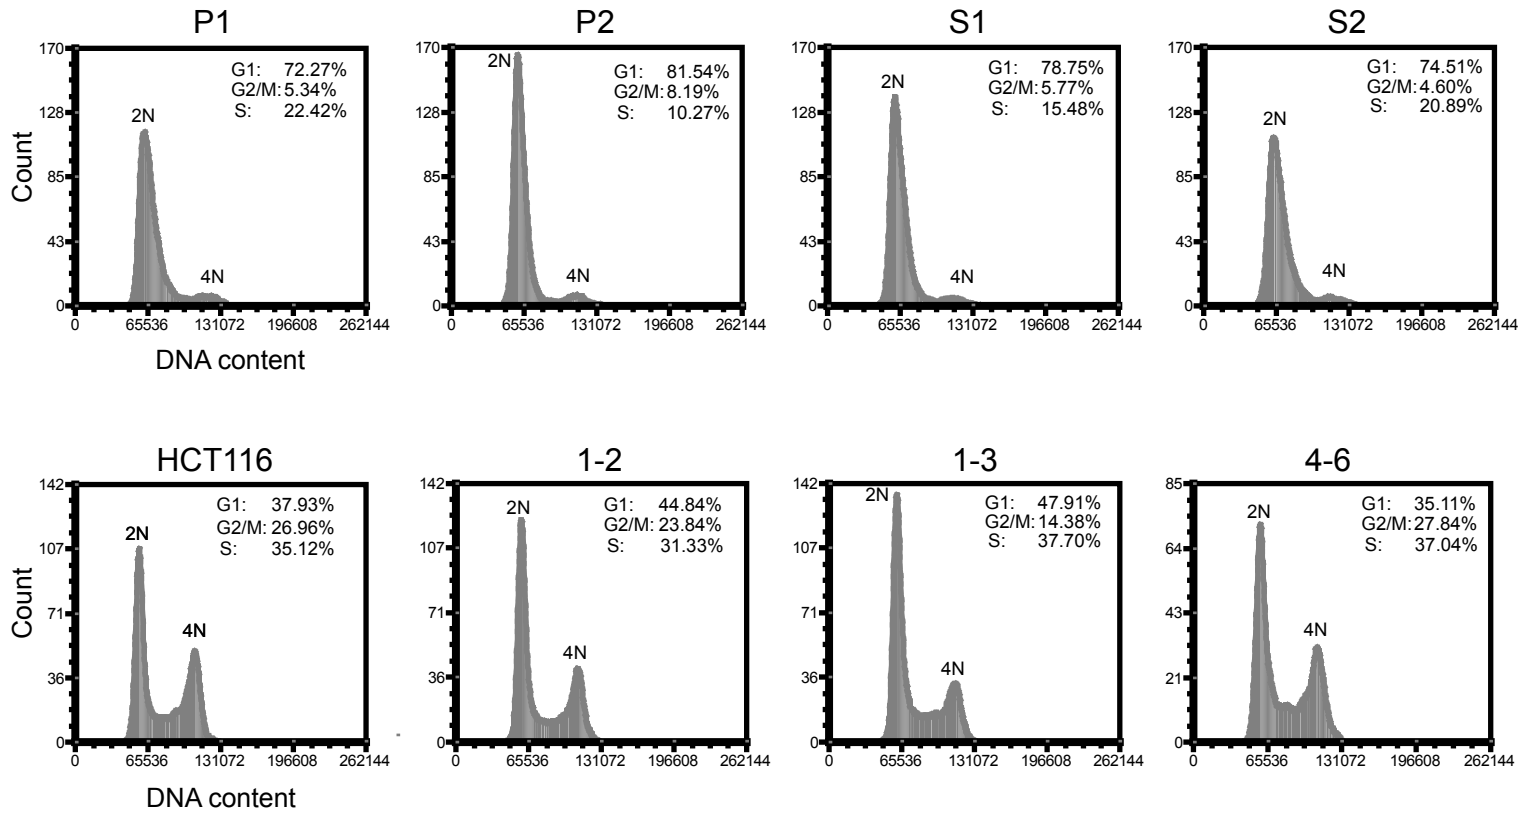

Supplementary Figure 7

Supplement: Supplementary file 1 [file 1 › S7 Fig.pdf]

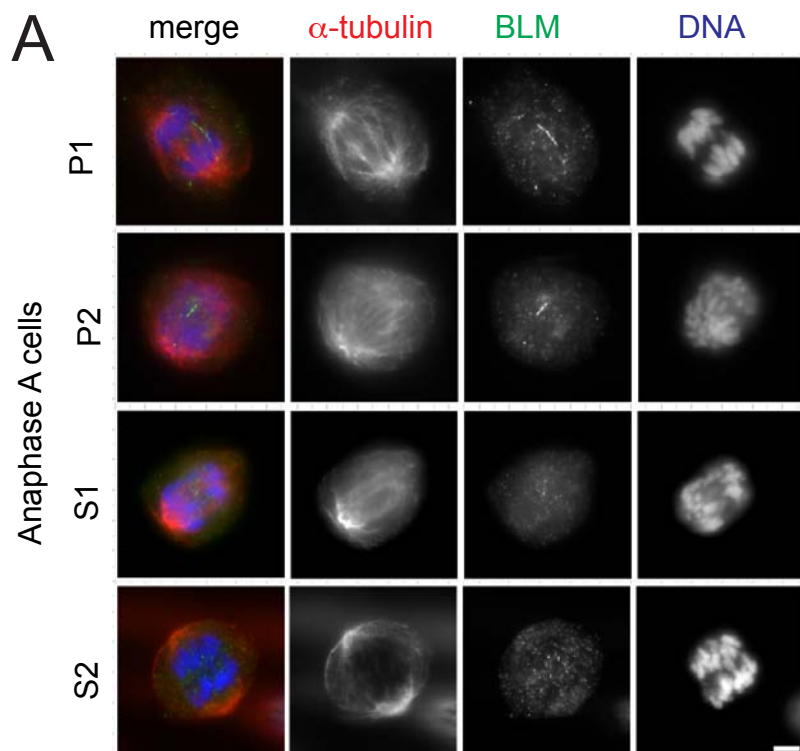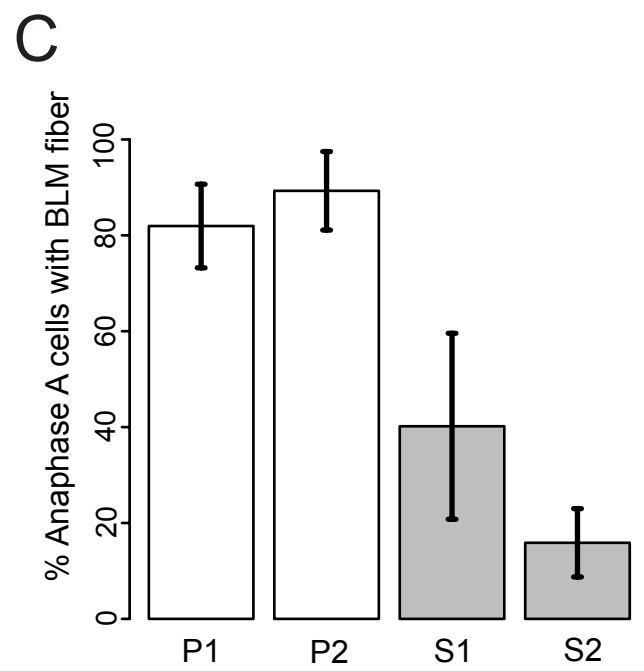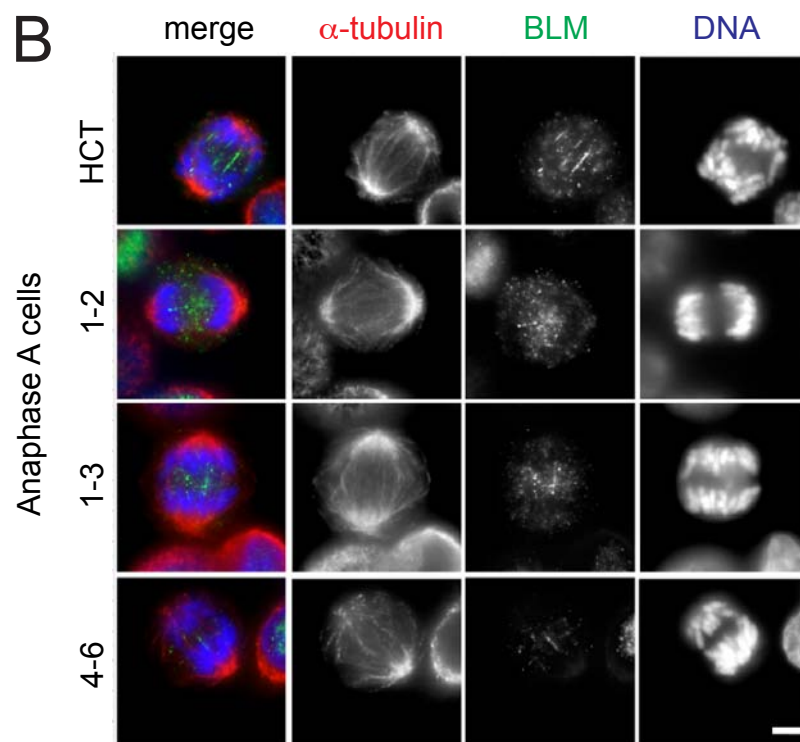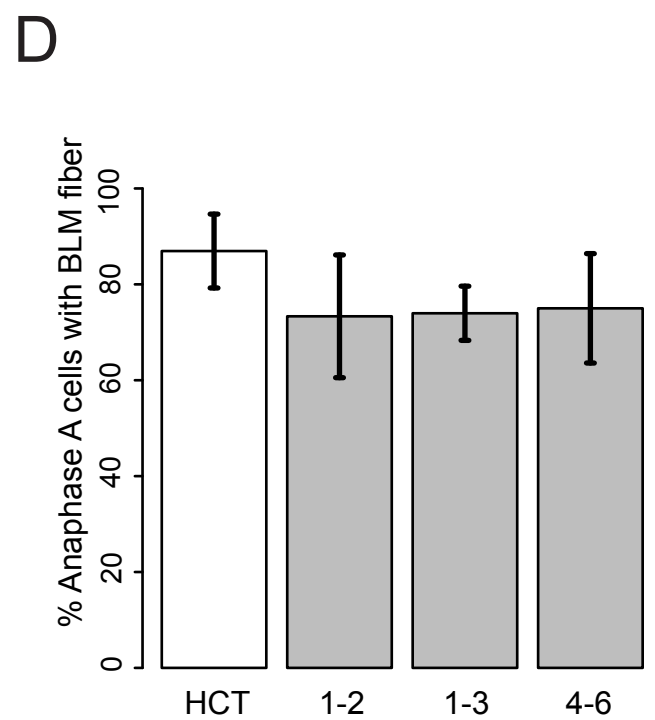

Supplementary Figure 8

Supplement: Supplementary file 1 [file 1 › S8 Fig.pdf]

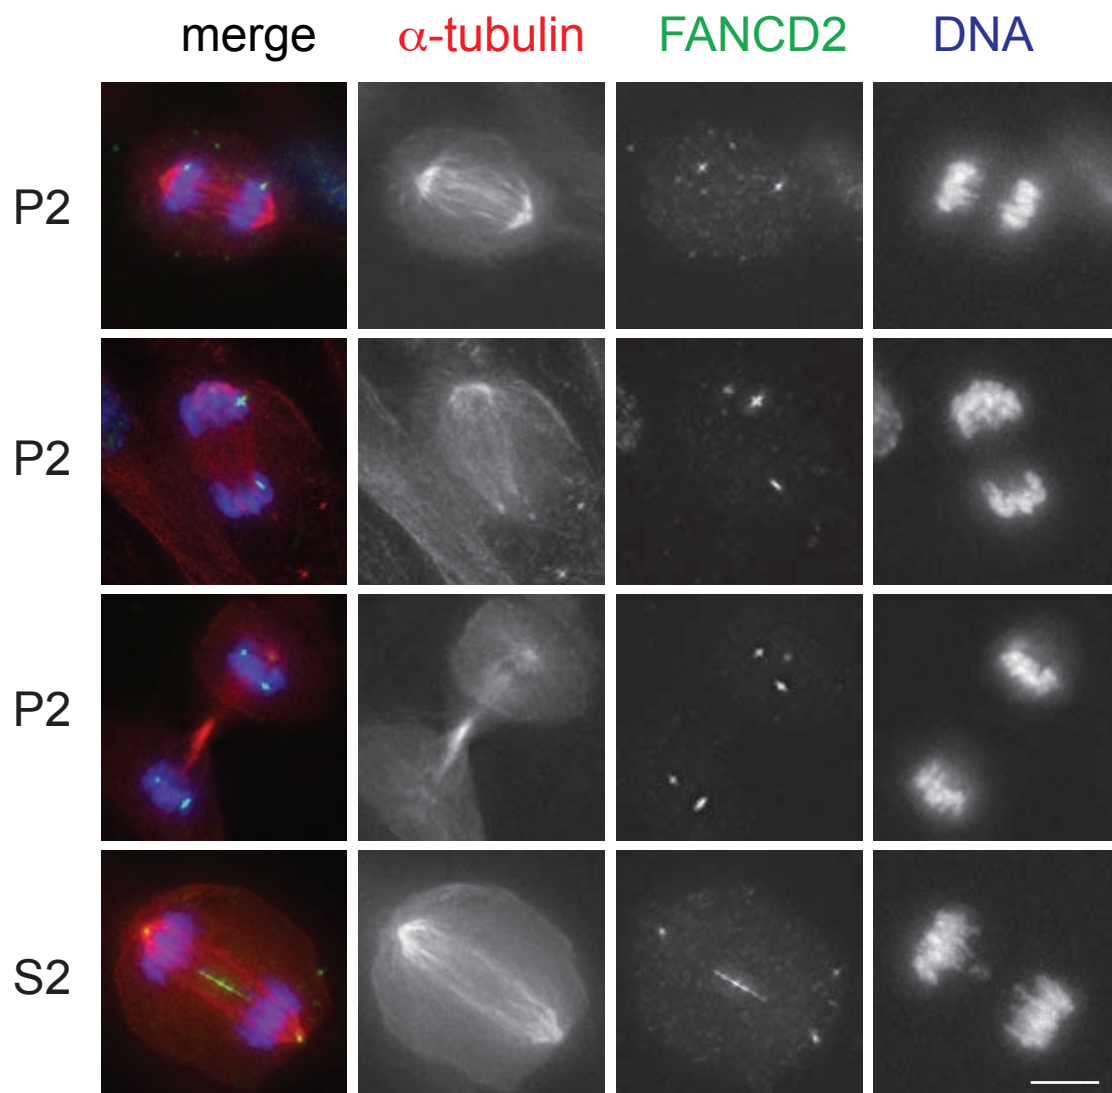

Supplementary Figure 9

Supplement: Supplementary file 1 [file 1 › S9 Fig.pdf]
